# Supplementary material for: Novel cofacial oxidative coupling reaction of phosphinine in the presence of Cu(i) and ClO4−
Source: Royal Society of Chemistry journal article supplement (doi:10.1039/b308892h), 2004-01-01
Supplement: b308892h.pdf [file b308892h.pdf]

Supplementary Information

For

**Novel Cofacial Oxidative Coupling Reaction of Phophinine in the  
Presence of Cu(I) and  $\text{ClO}_4^-$**

**Takahiko Kojima,\* Yoshitaka Ishioka, and Yoshihisa Matsuda\***

*Department of Chemistry, Faculty of Sciences, Kyushu University, Hakozaki, Higashi-  
Ku, Fukuoka 812-8581, Japan*

## Experimental section.

NMR spectra were recorded on JEOL EX-270 and Bruker AVANCE-Series (DPX400) spectrometers. UV-vis spectra were obtained on a Jasco Ubest-55 spectrometer and IR spectra were measured on a Jasco IR model 800 spectrophotometer. FAB-MS spectroscopy was done by using JMS-SX/SX102A tandem mass spectrometer. Elemental analyses were made at the Service Center of Elemental Analysis of Organic Compounds, Kyushu University.

TPP was synthesized according to the procedure reported by Märkl and coworkers.<sup>1</sup>

**Synthesis of [Cu(TPP)<sub>2</sub>]X (X = BF<sub>4</sub>, PF<sub>6</sub>).** To a solution of [Cu(CH<sub>3</sub>CN)<sub>4</sub>]PF<sub>6</sub> (45.8 mg, 1.23 X 10<sup>-4</sup> mol) in CH<sub>2</sub>Cl<sub>2</sub> (10 mL), was added TPP (74.4 mg, 2.29 X 10<sup>-4</sup> mol) as solids under N<sub>2</sub>. The mixture was stirred for 2h under N<sub>2</sub> at room temperature. The solvent was removed in vacuo and the residue was recrystallized from CH<sub>2</sub>Cl<sub>2</sub>/hexane to obtain yellow powder of [Cu(TPP)<sub>2</sub>]PF<sub>6</sub> (73.9 mg, 69.4% yield). Anal. Calcd for CuC<sub>46</sub>H<sub>34</sub>P<sub>2</sub>•PF<sub>6</sub>•2H<sub>2</sub>O: C, 61.85; H, 4.29. Found: C, 61.64; H, 4.31. The same procedure was used to prepare [Cu(TPP)<sub>2</sub>]BF<sub>4</sub>. Anal. Calcd for CuC<sub>46</sub>H<sub>34</sub>P<sub>2</sub>•BF<sub>4</sub>•2H<sub>2</sub>O: C, 66.16; H, 4.59. Found: C, 65.77; H, 4.55.

**X-ray Crystallography of 1.** A yellow block crystal of **1** was mounted on a glass fiber. All measurements were made on a Rigaku RAXIS-RAPID Imaging Plate diffractometer with graphite monochromated Mo-K $\alpha$  radiation. Indexing was performed from 3 oscillations which were exposed for 3 minutes. The camera radius was 127.40 mm. Readout was made in the 0.100 mm pixel mode. The data were

collected at  $-160 \pm 1^\circ\text{C}$  to a maximum  $2\theta$  value of  $54.8^\circ$ . A total of 114 images, corresponding to  $228.0^\circ$  oscillation angles, were collected with two different goniometer settings. Exposure time was 2.00 minutes per degree. Data were processed by the PROCESS-AUTO program package. A total of 62800 reflections collected, 5244 were unique ( $R_{\text{int}} = 0.088$ ). A symmetry-related absorption correction using the program ABSCOR was applied, which resulted in transmission factor ranging from 0.56 to 0.97. The data were corrected for Lorentz and polarization effects.

The structure was solved by direct methods and expanded using Fourier technique. The non-hydrogen atoms were refined anisotropically and hydrogen atoms were included but not refined. All calculations were performed by using the teXsan crystallographic software package of Molecular Structure Corporation.

Table S1. Crystallographic data for **1**.

|                                  |                                                  |
|----------------------------------|--------------------------------------------------|
| Experimental Formula             | $\text{C}_{92}\text{H}_{68}\text{O}_6\text{P}_4$ |
| Formula weight                   | 1393.44                                          |
| Crystal dimension, $\text{mm}^3$ | 0.20X0.40X0.35                                   |
| Crystal system                   | monoclinic                                       |
| Space group                      | $P2_1/n$                                         |
| a, Å                             | 23.4513(5)                                       |

|                                                       |                                           |
|-------------------------------------------------------|-------------------------------------------|
| b, Å                                                  | 13.4607                                   |
| c, Å                                                  | 24.5485(5)                                |
| $\beta$ , deg                                         | 116.1286(4)                               |
| V, Å <sup>3</sup>                                     | 6957.3(2)                                 |
| Z                                                     | 4                                         |
| D(calc), g/cm <sup>3</sup>                            | 1.330                                     |
| $\mu$ (Mo K $\alpha$ ), cm <sup>-1</sup>              | 1.69                                      |
| Temperature, °C                                       | -160±1                                    |
| $2\theta_{\max}$ , deg                                | 54.8                                      |
| No. of reflections measured                           | 62800                                     |
| No of reflections, unique                             | 5244                                      |
| No of reflections used (all, $2\theta < 54.8^\circ$ ) | 15730                                     |
| No of variables                                       | 919                                       |
| R; Rw                                                 | 0.159; 0.185                              |
| R1 ( $I > 2\sigma(I)$ ; 8151 reflections)             | 0.072                                     |
| GOF                                                   | 1.02                                      |
| Maximum/minimum peaks in final diff.<br>map           | 1.08/-1.34 e <sup>-</sup> /Å <sup>3</sup> |

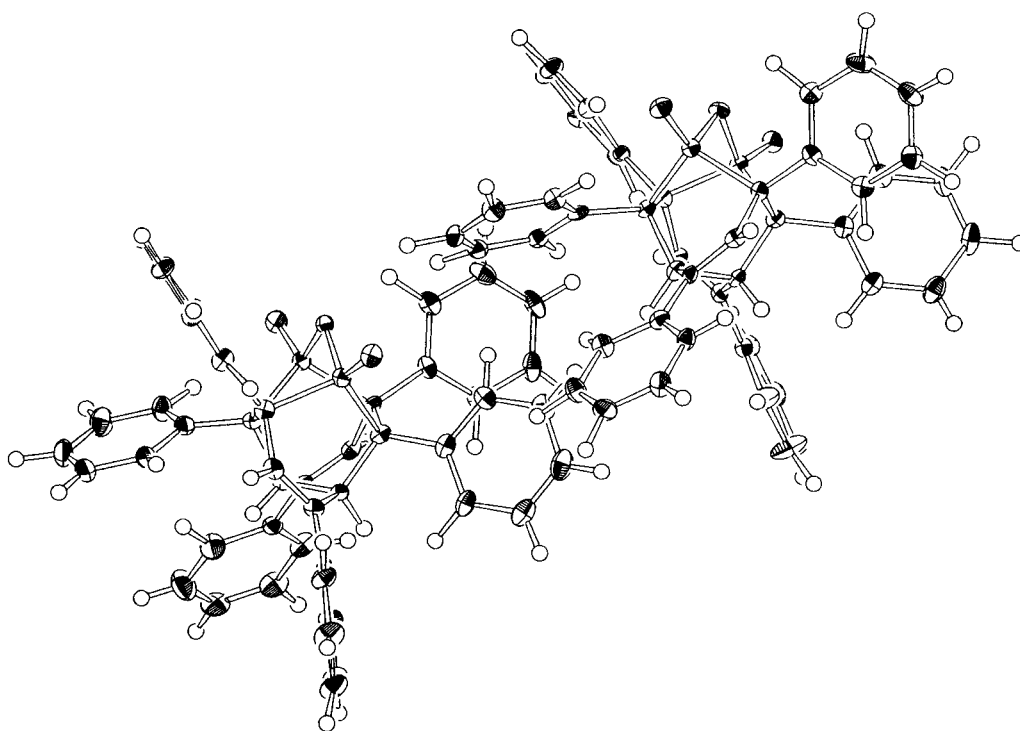

**Figure S1.** Crystal structures of *R*- and *S*-**1** in the asymmetric unit.

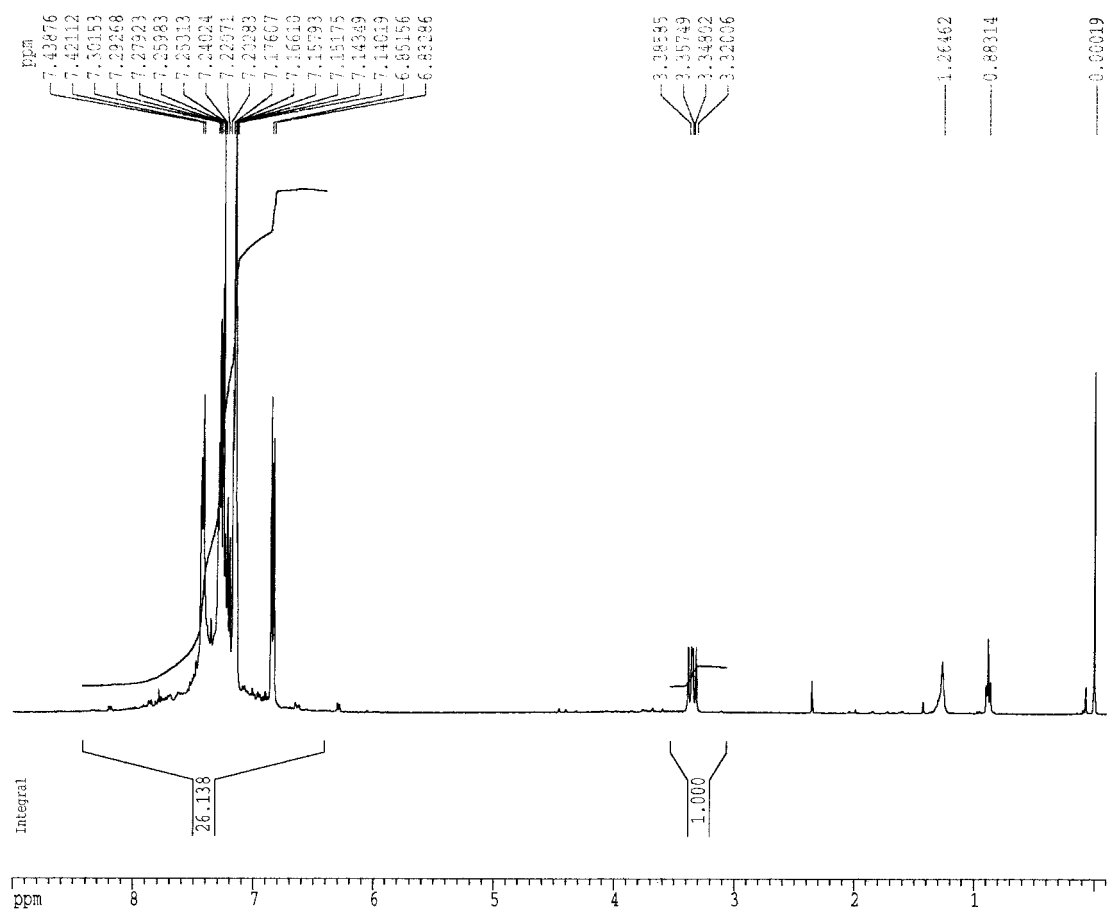

**Figure S2.**  $^1\text{H}$  NMR spectrum of **1** (in  $\text{CDCl}_3$ ).

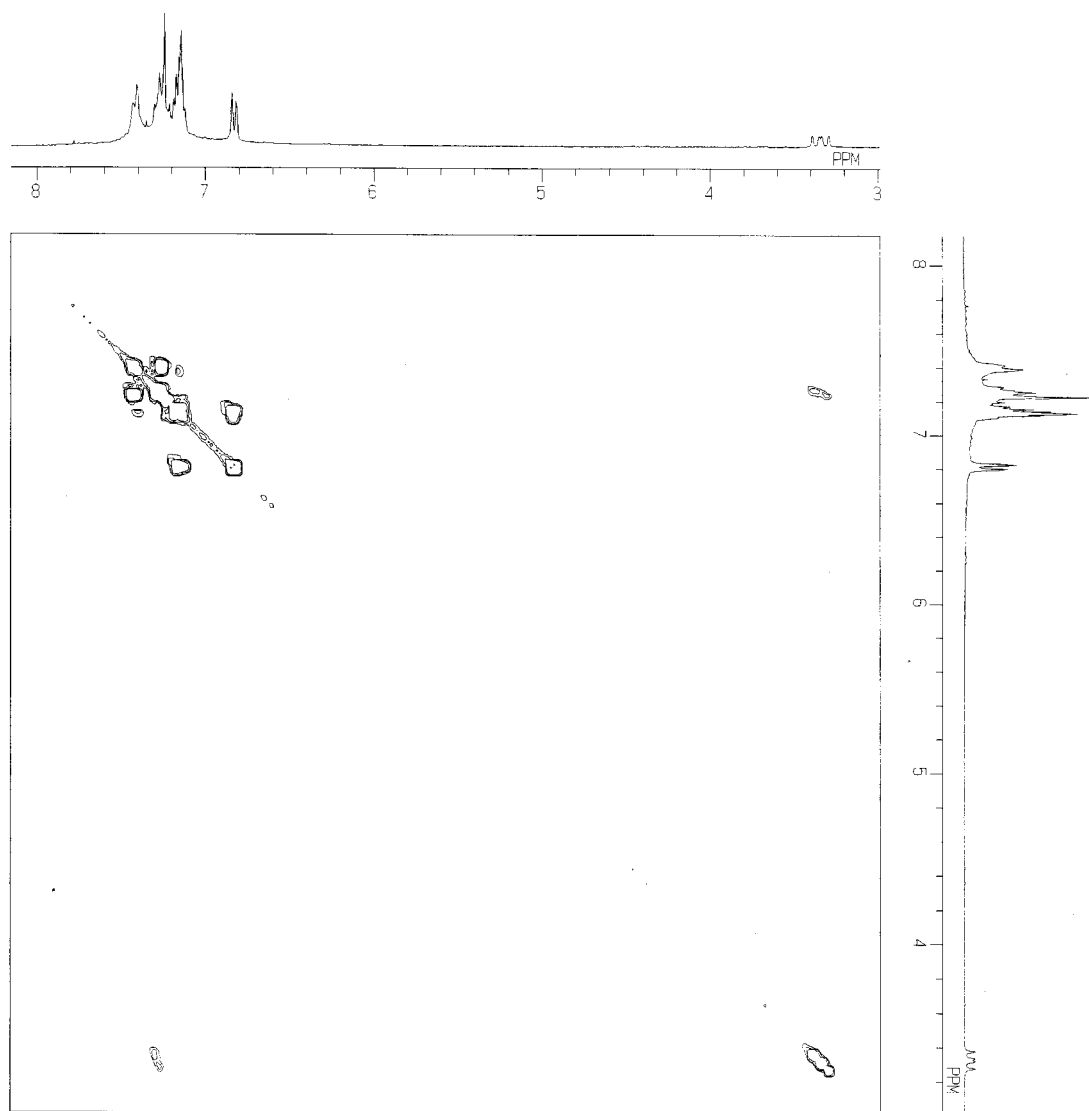

**Figure S3.**  $^1\text{H}$ - $^1\text{H}$  COSY spectrum of (in  $\text{CDCl}_3$ ).

(a)

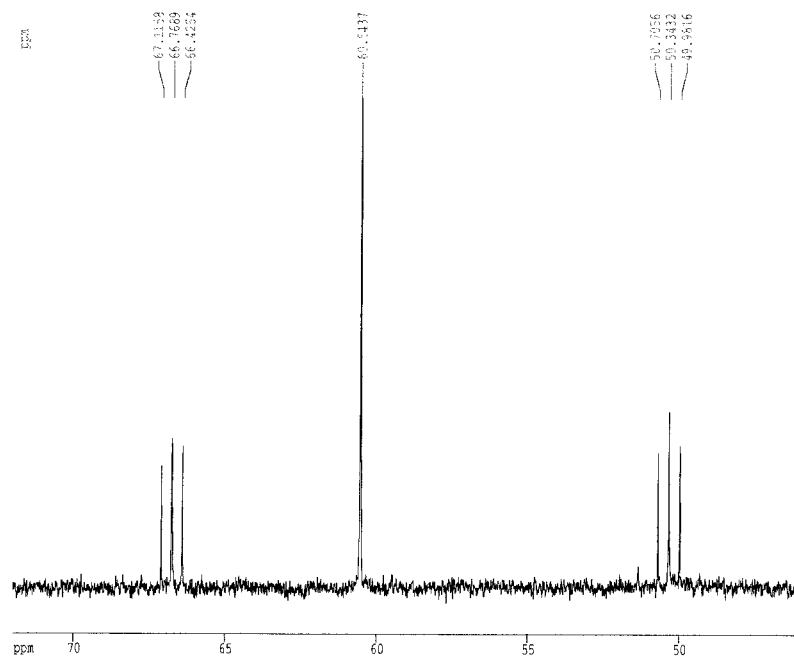

(b)

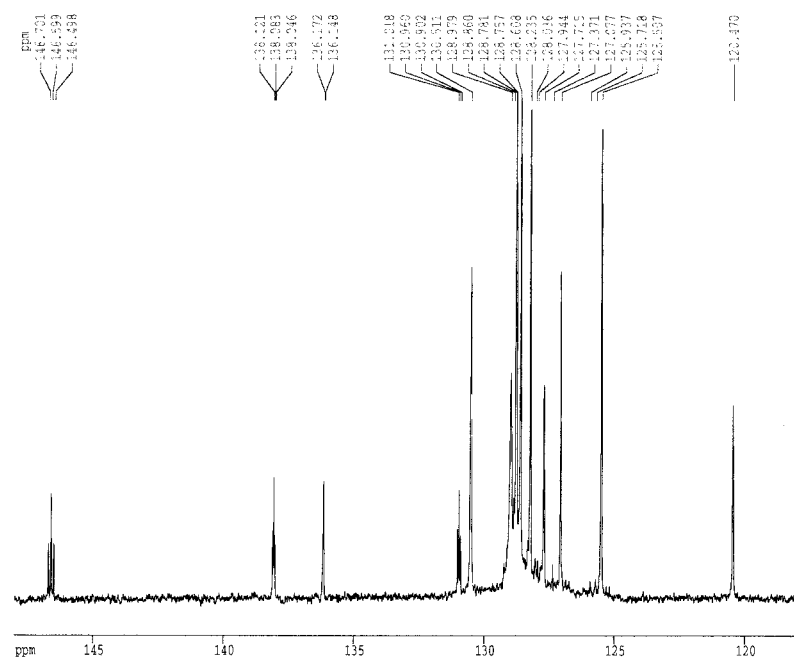

**Figure S4.** <sup>13</sup>C{<sup>1</sup>H} NMR spectrum of **1** (in CDCl<sub>3</sub>): (a) aliphatic region, (b) aromatic region.



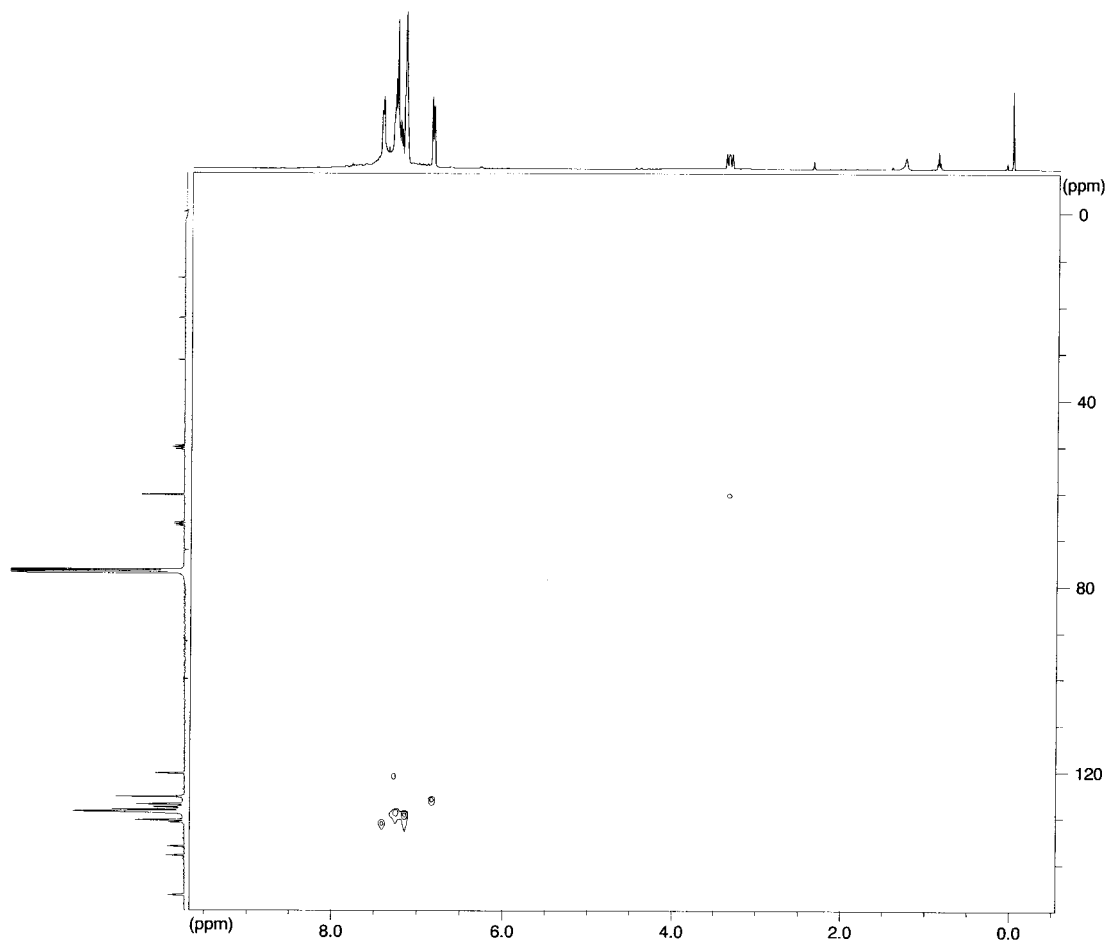

**Figure S5.** HMQC spectrum of **1** (in  $\text{CDCl}_3$ ).

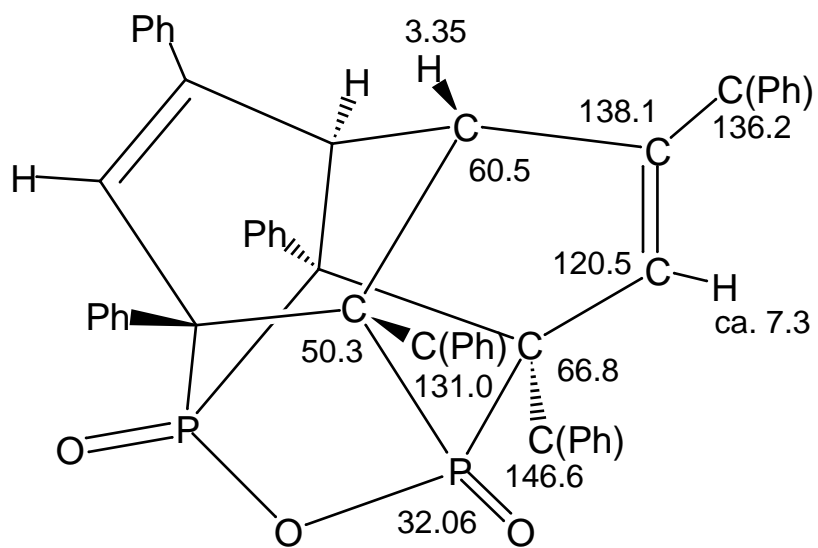

Chemical Shifts of each nucleus (ppm) in  $\text{CDCl}_3$ .

**Figure S6.** Peak assignments for the core moiety of **1**.
